# Supplementary material
Source: bioRxiv or medRxiv preprint supplement (https://medrxiv.org/highwire/filestream/77118/field_highwire_adjunct_files/0/2020.04.15.20063578-1.pdf)
Supplement: Supplementary file [file 2020.04.15.20063578-1.pdf]

## Supplementary Materials

### **Computational Modeling of Attentional Impairments in Disruptive Mood Dysregulation Disorder and Attention Deficit/Hyperactivity Disorder**

Simone P. Haller, DPhil\*<sup>†1</sup>, Joel Stoddard, MD, MAS\*<sup>2</sup>, David Pagliaccio, PhD<sup>3</sup>, Hong Bui, BA<sup>1</sup>, Caroline MacGillivray, BA<sup>1</sup>, Matt Joes, PhD<sup>4</sup>, & Melissa A. Brotman, PhD<sup>1</sup>

\*The authors contributed equally

<sup>1</sup> *Emotion and Development Branch, National Institute of Mental Health, National Institutes of Health, 9000 Rockville Pike, Bethesda, MD, 20892*

<sup>2</sup> *Pediatric Mental Health Institute, Children's Hospital Colorado, Department of Psychiatry & Neuroscience Program, University of Colorado, Anschutz Medical Campus, 13123 East 16th Avenue, Aurora, CO, 80045*

<sup>3</sup> *Division of Child and Adolescent Psychiatry, New York State Psychiatric Institute, Department of Psychiatry, Vagelos College of Physicians and Surgeons, Columbia University, 1051 Riverside Drive, New York, NY 10032*

<sup>4</sup> *Department of Psychology and Neuroscience, University of Colorado Boulder, Boulder, CO, 80309*

## 1. ISVRT

We expected youth with ADHD only and the DMDD + ADHD group to show increased ISVRT and decreased processing efficiency. ISVRT was measured as the coefficient of variation (CoV), the standard deviation/mean RT for correct responses. Comparisons of ISVRT were conducted using multivariate model testing for effects of ADHD (present/absent), DMDD (present/absent), task condition (congruent, incongruent, neutral) and their interaction, and Age and IQ as covariates. In a smaller sample ( $n=87$ ), we also examined associations of CoV with ARI and Conners' scores (hyperactivity and inattentiveness tested in separate models), task condition with Age, and IQ as covariates.

### Results

For the CoV omnibus model, the DMDD-by-ADHD-by-task condition interaction was marginally significant ( $b=0.03$ ,  $p=0.05$ ,  $90\%CI=[0.00, 0.06]$ , see Table S1).

Table S1. Mixed model outcomes, ISVRT

| <i>Predictors</i>                               | <i>Estimates</i> | <b>CoV</b>    |                  |
|-------------------------------------------------|------------------|---------------|------------------|
|                                                 |                  | <i>CI</i>     | <i>p</i>         |
| (Intercept)                                     | 0.37             | 0.29 – 0.45   | <b>&lt;0.001</b> |
| ADHD [1]                                        | 0.02             | 0.00 – 0.05   | <b>0.020</b>     |
| DMDD [1]                                        | 0.03             | -0.00 – 0.05  | 0.061            |
| Condition [Congruent]                           | 0.00             | -0.01 – 0.02  | 0.536            |
| Condition [Incongruent]                         | 0.00             | -0.01 – 0.01  | 0.968            |
| Age                                             | -0.01            | -0.01 – -0.00 | <b>&lt;0.001</b> |
| FSIQ                                            | -0.00            | -0.00 – -0.00 | <b>0.001</b>     |
| ADHD [1] * DMDD [1]                             | -0.04            | -0.07 – -0.00 | <b>0.029</b>     |
| ADHD [1] * Condition [Congruent]                | -0.01            | -0.03 – 0.01  | 0.197            |
| ADHD [1] * Condition [Incongruent]              | -0.02            | -0.03 – 0.00  | 0.081            |
| DMDD [1] * Condition [Congruent]                | -0.01            | -0.04 – 0.01  | 0.282            |
| DMDD [1] * Condition [Incongruent]              | -0.02            | -0.04 – 0.00  | 0.117            |
| (ADHD [1] * DMDD [1]) * Condition [Congruent]   | 0.02             | -0.01 – 0.05  | 0.129            |
| (ADHD [1] * DMDD [1]) * Condition [Incongruent] | 0.03             | -0.00 – 0.06  | 0.053            |
| <b>Random Effects</b>                           |                  |               |                  |
| $\sigma^2$                                      | 0.00             |               |                  |
| $\tau_{00}$ Subject                             | 0.00             |               |                  |
| ICC                                             | 0.64             |               |                  |
| N <sub>Subject</sub>                            | 187              |               |                  |
| Observations                                    | 561              |               |                  |

Marginal  $R^2$  / Conditional  $R^2$  0.141 / 0.688

a. Reference levels for factor contrasts are ADHD is absent, DMDD is absent, and Flanker condition is “Neutral.”

## 2. Associations between CoV and Drift Diffusion parameters

Correlations between drift rate and CoV were high across conditions (neutral:  $r=-.74$ ,  $p<.001$ ; congruent:  $r=-.74$ ,  $p<.001$ , incongruent:  $r=-.62$ ,  $p<.001$ ).

Table S2. Correlations between CoV (ISVRT) and DDM parameter  $v$

| DDM parameters | Condition   | CoV            |
|----------------|-------------|----------------|
| $v$            | neutral     | <b>-.74***</b> |
|                | congruent   | <b>-.74***</b> |
|                | incongruent | <b>-.62***</b> |

Note. \* $p<.05$ , \*\* $p<.01$ , \*\*\* $p<.001$

## 3. Hyperactivity Model

Table 3. Mixed model outcomes, Hyperactivity

| Predictors                                      | Estimates | $v$           |  | $p$              |
|-------------------------------------------------|-----------|---------------|--|------------------|
|                                                 |           | CI            |  |                  |
| (Intercept)                                     | -4.12     | -8.81 – 0.57  |  | 0.089            |
| pARI_Factor [High]                              | -0.60     | -2.26 – 1.05  |  | 0.476            |
| Hyperactivity                                   | -0.09     | -0.18 – -0.01 |  | <b>0.038</b>     |
| Condition [Congruent]                           | -0.07     | -0.62 – 0.48  |  | 0.802            |
| Condition [Incongruent]                         | -2.75     | -3.30 – -2.21 |  | <b>&lt;0.001</b> |
| Age                                             | 0.41      | 0.24 – 0.58   |  | <b>&lt;0.001</b> |
| FSIQ                                            | 0.04      | 0.02 – 0.07   |  | <b>0.004</b>     |
| pARI_Factor [High] *<br>Hyperactivity           | 0.06      | -0.07 – 0.19  |  | 0.391            |
| pARI_Factor [High] *<br>Condition [Congruent]   | -0.44     | -1.57 – 0.70  |  | 0.451            |
| pARI_Factor [High] *<br>Condition [Incongruent] | 0.20      | -0.93 – 1.33  |  | 0.729            |

|                                                                      |       |              |       |
|----------------------------------------------------------------------|-------|--------------|-------|
| Hyperactivity * Condition<br>[Congruent]                             | -0.00 | -0.06 – 0.06 | 0.990 |
| Hyperactivity * Condition<br>[Incongruent]                           | 0.06  | -0.00 – 0.11 | 0.057 |
| (pARI_Factor [High] *<br>Hyperactivity) *<br>Condition [Congruent]   | 0.02  | -0.07 – 0.10 | 0.738 |
| (pARI_Factor [High] *<br>Hyperactivity) *<br>Condition [Incongruent] | -0.02 | -0.11 – 0.07 | 0.704 |

**Random Effects**

|                                    |               |
|------------------------------------|---------------|
| $\sigma^2$                         | 0.84          |
| $\tau_{00}$ Subject                | 2.76          |
| ICC                                | 0.77          |
| $N_{\text{Subject}}$               | 87            |
| <hr/>                              |               |
| Observations                       | 261           |
| Marginal $R^2$ / Conditional $R^2$ | 0.422 / 0.865 |

a. References levels for factor contrasts low ARI score (median split), and Flanker condition is “Neutral.”
